# Supplementary material
Source: PubMed Central journal article supplement (PMC3932306)
Supplement: NIHMS551797-supplement-1_si_002.pdf [file NIHMS551797-supplement-1_si_002.pdf]

# **The Marine Cyanobacterial Metabolite Gallinamide A is a Potent and Selective Inhibitor of Human Cathepsin L**

Bailey Miller,<sup>†</sup> Aaron J Friedman,<sup>‡</sup> Hyukjae Choi,<sup>†</sup> James Hogan,<sup>§</sup> J. Andrew McCammon,<sup>⊥||∇</sup>  
Vivian Hook,<sup>§</sup> and William H. Gerwick<sup>\*†§</sup>

<sup>†</sup>Center for Marine Biotechnology and Biomedicine, Scripps Institution of Oceanography, <sup>‡</sup>  
Biomedical Sciences Graduate Program, <sup>§</sup>Skaggs School of Pharmacy and Pharmaceutical  
Sciences, <sup>⊥</sup>Department of Chemistry and Biochemistry, <sup>||</sup> Department of Pharmacology,  
<sup>∇</sup>Howard Hughes Medical Institute, University of California San Diego, La Jolla, CA, 92093

## **Supporting Information**

**S1. Fractionation and isolation scheme**

**S2. Cathepsin L activity assay for HPLC fractions**

**S3. ESI-MS/MS and MS<sup>3</sup> spectra of Gallinamide A (1)**

**S4. <sup>1</sup>H NMR spectrum of gallinamide A (1) in CDCl<sub>3</sub> (500 MHz)**

**S5. <sup>1</sup>H-<sup>1</sup>H COSY spectrum of gallinamide A (1) in CDCl<sub>3</sub> (500 MHz)**

**S6. UV and HR-ESITOFMS of gallinamide A (1)**

S1. Fractionation and isolation scheme

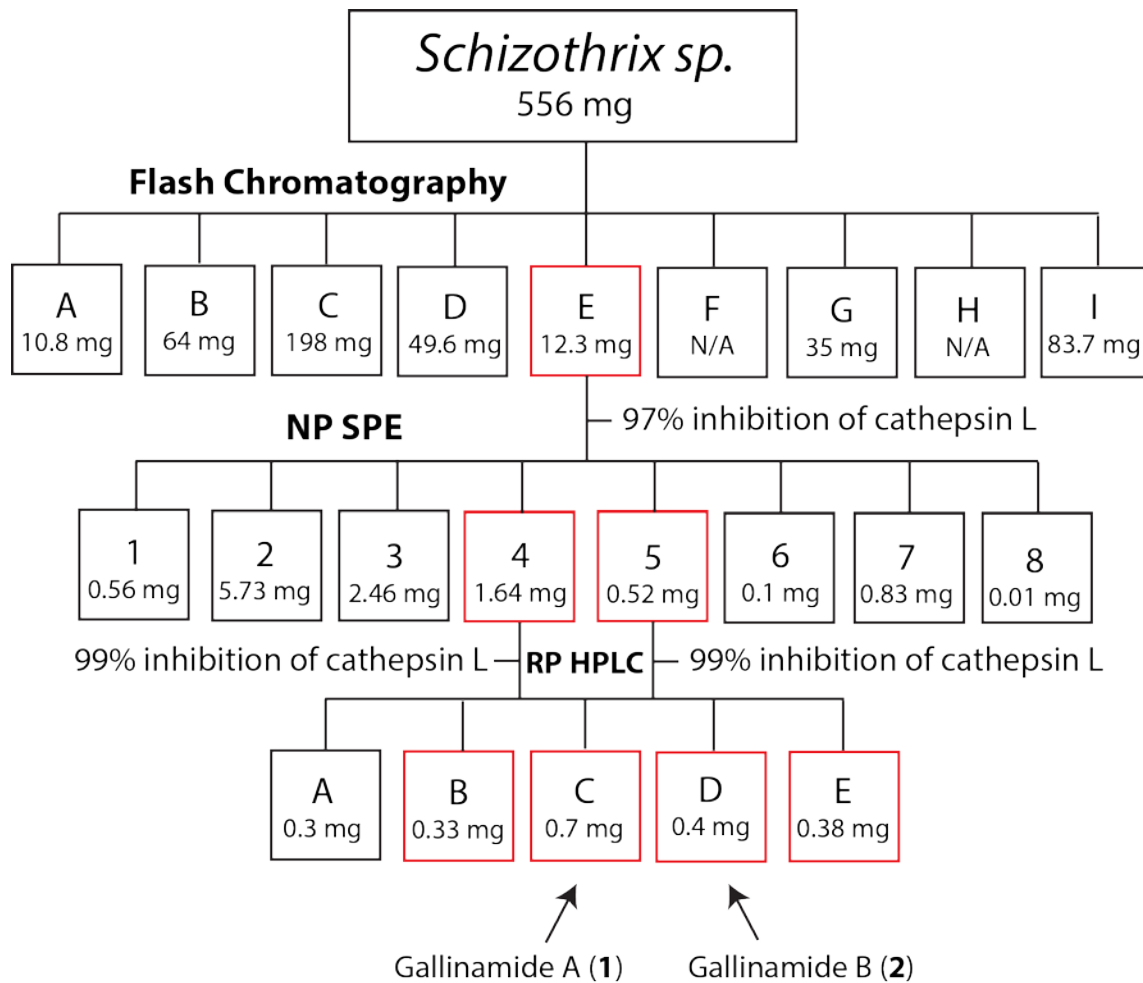

## S2. Cathepsin L activity assay for HPLC collections

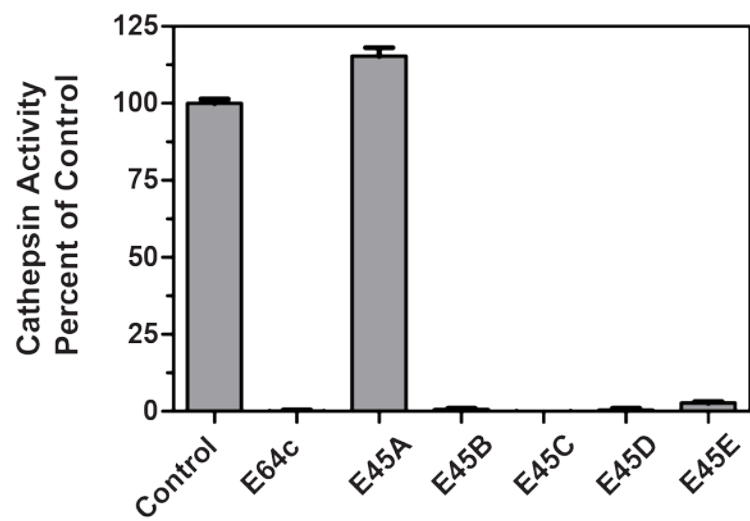

### S3. ESI-MS/MS and MS<sup>3</sup> spectra of Gallinamide A (1)

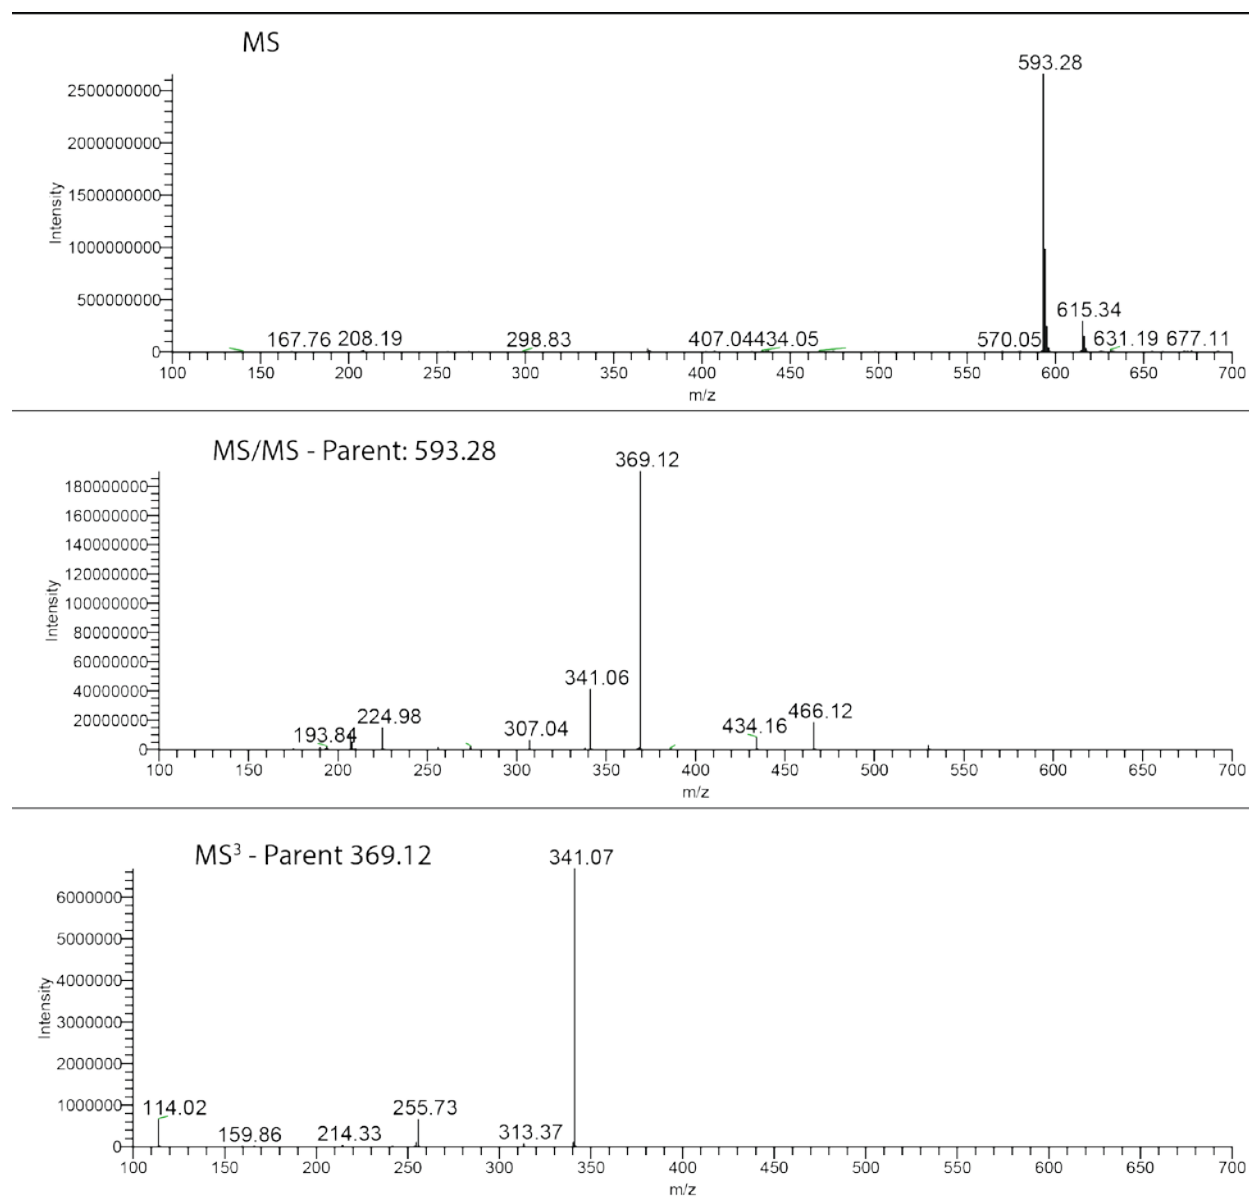



S4.  $^1\text{H}$  NMR spectrum of gallinamide A (**1**) in  $\text{CDCl}_3$  (500 MHz)

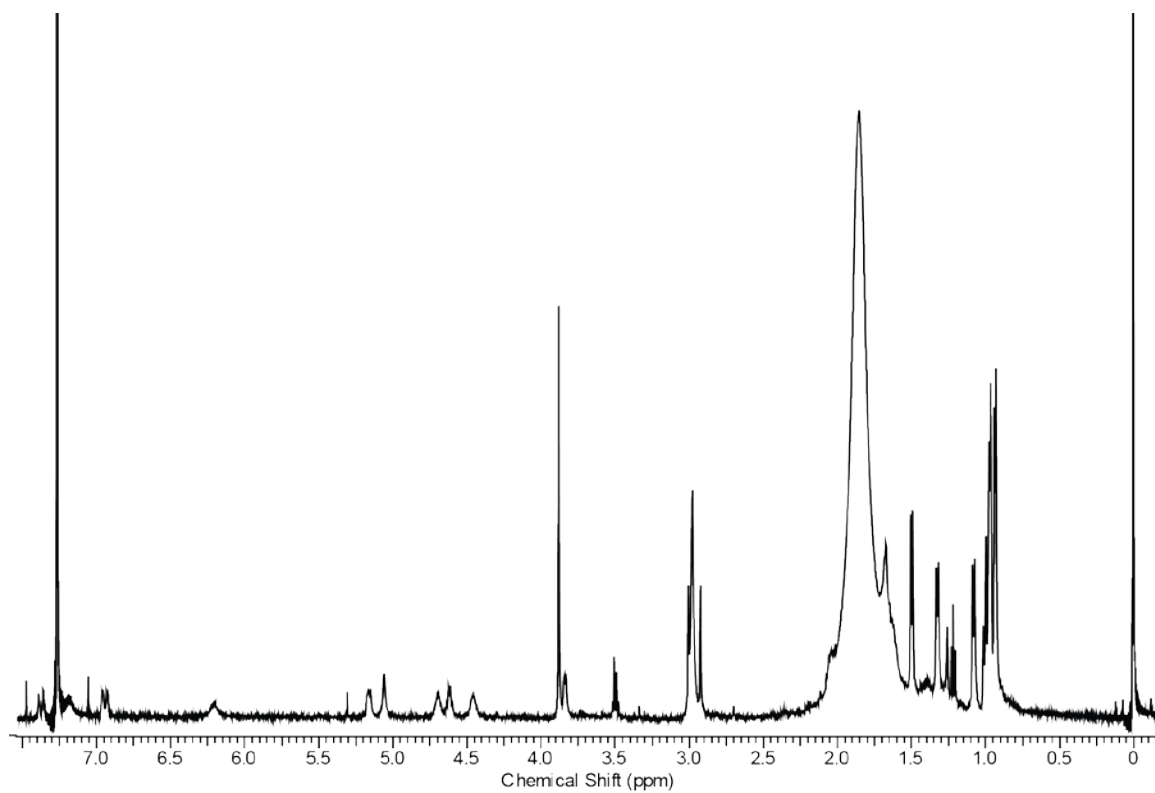

$^1\text{H}$  NMR ( $\text{CDCl}_3$ , 500 MHz)  $\delta$  7.42 (1H, d,  $J = 15.8$  Hz, H-8), 7.14 (1H, brs, 13-NH), 6.94 (1H, dd,  $J = 15.8, 4.3$  Hz, H-9), 6.21 (1H, brd, 10-NH), 5.16 (1H, dd,  $J = 9.3, 4.0$  Hz, H-19), 5.05 (1H, s, H-2), 4.69 (1H, m, H-10), 4.61 (1H, q,  $J = 6.5$  Hz, H-4), 4.45 (1H, brdd, H-13), 3.88 (3H, s, O-Me), 3.83 (1H, d,  $J = 5.9$  Hz, H-25), 2.98 (6H, brs, H-30), 2.04 (1H, m, H-26), 1.84 (2H, m, H-20a), 1.67 (2H, m, H-14), 1.66 (1H, m, H-15), 1.63 (2H, m, H-20b), 1.62 (1H, m, H-21), 1.5 (3H, d,  $J = 6.5$  Hz, H-5), 1.4 (2H, brm, H-27), 1.32 (3H, d,  $J = 6.5$  Hz, H-11), 1.08 (3H, d,  $J = 6.5$  Hz, H-29), 0.99 (3H, t,  $J = 7.3$  Hz, H-28), 0.96 (3H, d, H-22), 0.96 (3H, d,  $J = 6.2$  Hz, H-16), 0.93 (3H, d,  $J = 6.2$  Hz, H-17), 0.92 (3H, d,  $J = 6.2$  Hz, H-23)
